# Supplementary material for: Integrating Serum Biomarkers into Prediction Models for Biochemical Recurrence Following Radical Prostatectomy
Source: MDPI journal article supplement (doi:10.3390/cancers13164162), 2021-08-19
Supplement: s1 [file s1]

# Supplementary Materials: Integrating Serum Biomarkers into Prediction Models for Biochemical Recurrence following Radical Prostatectomy

Shirin Moghaddam, Amirhossein Jalali, Amanda O'Neill, Lisa Murphy, Laura Gorman, Anne-Marie Reilly, Áine Heffernan, Thomas Lynch, Richard Power, Kieran J. O'Malley, Kristin A. Taskèn, Viktor Berge, Vivi-Ann Solhaug, Helmut Klocker, Brendan Murphy and R. William Watson

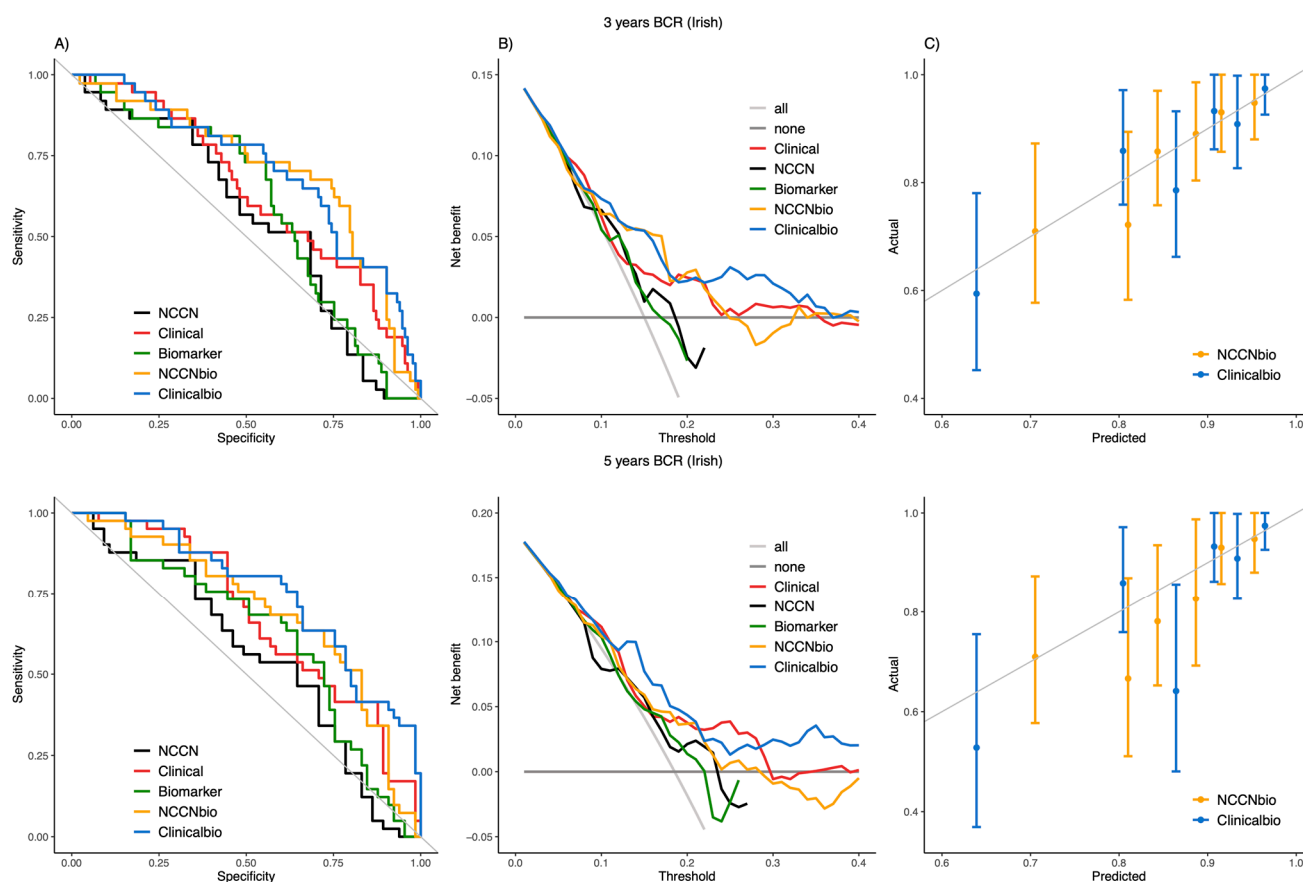

**Figure S1.** ROC curve (A), decision curve (B) and calibration plot (C) of the 'NCCNbio' and 'Clinicalbio' models internally compared with 'NCCN', 'Clinical' and 'Biomarker' models in the Irish cohort at 3-year (on the top) and 5-year (on the bottom).

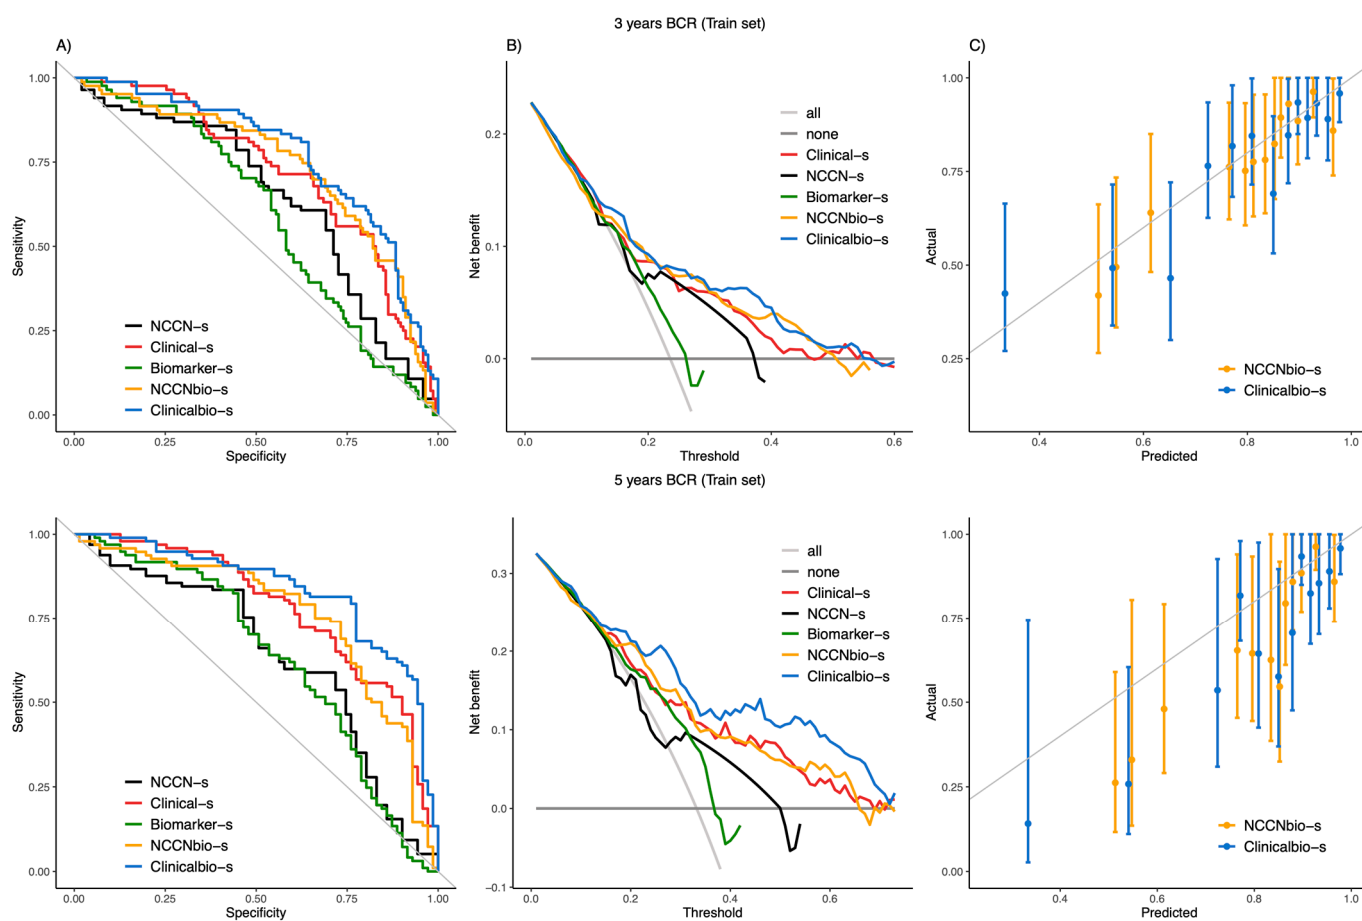

**Figure S2.** ROC curve (A), decision curve (B) and calibration plot (C) of the 'NCCNbio-s' and 'Clinicalbio-s' models internally compared with 'NCCN', 'Clinical' and 'Biomarker' models in the train set at 3-year (on the top) and 5-year (on the bottom).

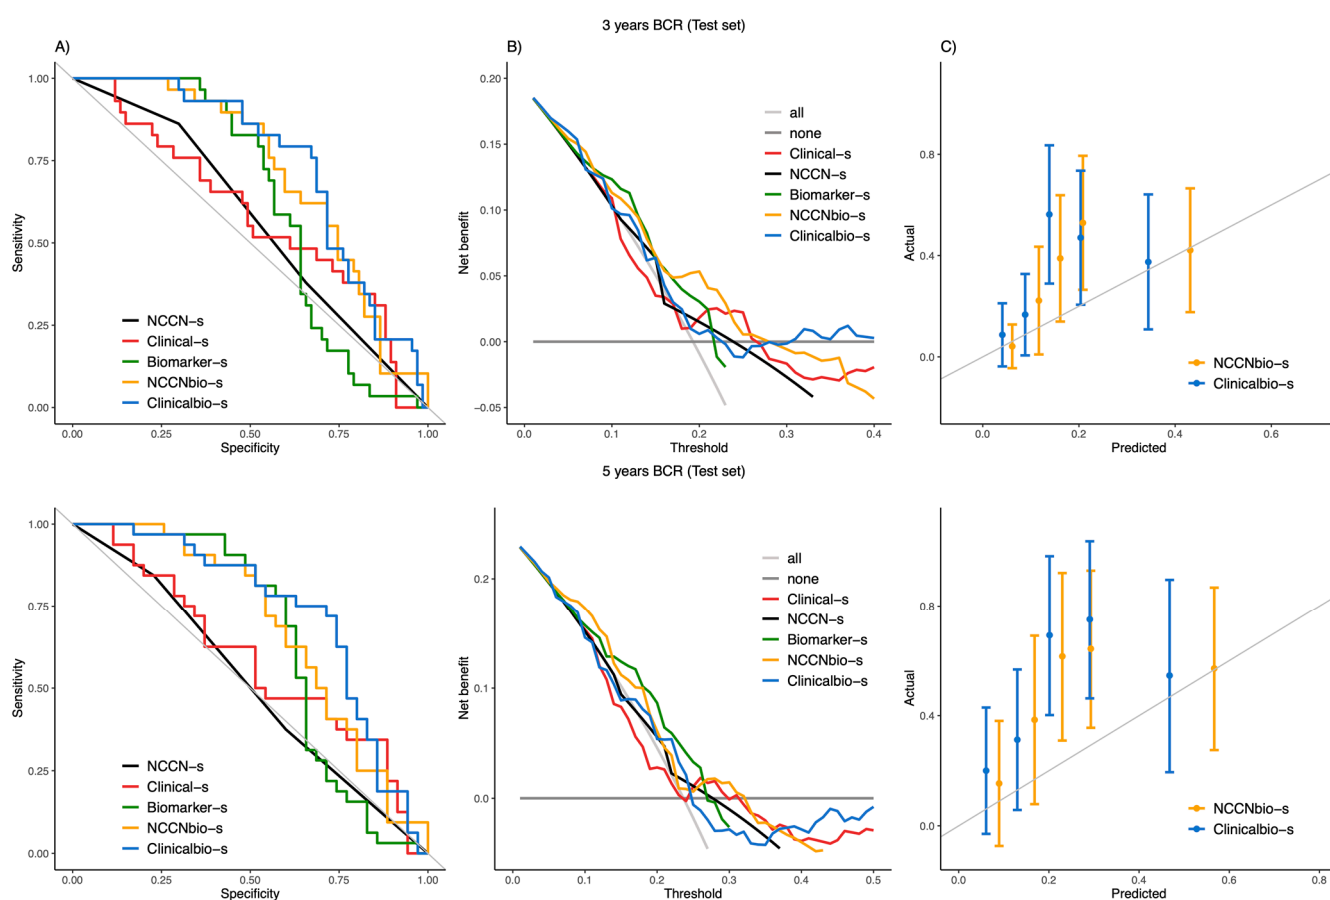

**Figure S3.** ROC curve (A), decision curve (B) and calibration plot (C) of the 'NCCNb-s' and 'Clinicalbio-s' models externally compared with 'NCCN', 'Clinical' and 'Biomarker' models in independent test set at 3-year (on the top) and 5-year (on the bottom).

**Table S1.** Clinical characteristics of the patients in the train and test sets including the univariate *p*-value for each clinical variable <sup>a</sup>.

| Features                            | Train set   | Test Set    | <i>p</i> -Value <sup>b</sup> |
|-------------------------------------|-------------|-------------|------------------------------|
| <b>Sample size (<i>n</i> = 577)</b> | 405         | 172         |                              |
| <b>Cohort samples</b>               |             |             |                              |
| Irish                               | 184 (45%)   | 87 (51%)    |                              |
| Austrian                            | 90 (22%)    | 38 (22%)    |                              |
| Norwegian                           | 131 (32%)   | 47 (27%)    |                              |
| <b>Pre-op</b>                       |             |             |                              |
| PSA                                 |             |             | 0.8                          |
| Mean (SD)                           | 8.77 (6.18) | 8.54 (5.47) |                              |
| DRE                                 |             |             | 0.9                          |
| Normal                              | 331 (82%)   | 139 (81%)   |                              |
| Abnormal                            | 74 (18%)    | 33 (19%)    |                              |
| Biopsy Gleason Score                |             |             | 0.2                          |
| 6                                   | 183 (45%)   | 80 (46%)    |                              |
| 7                                   | 147 (36%)   | 70 (41%)    |                              |
| 8 and above                         | 75 (19%)    | 22 (13%)    |                              |
| <b>Post-op</b>                      |             |             |                              |
| Gleason Score                       |             |             | 0.004                        |
| 6                                   | 121 (30%)   | 68 (40%)    |                              |
| 7                                   | 192 (48%)   | 81 (48%)    |                              |

|                                         |           |           |     |
|-----------------------------------------|-----------|-----------|-----|
| 8 and above                             | 91 (22%)  | 20 (12%)  | 0.4 |
| Stage                                   |           |           |     |
| Organ confined                          | 221 (55%) | 101 (59%) |     |
| Non organ confined                      | 184 (45%) | 71 (41%)  |     |
| <b>Time to biochemical reoccurrence</b> |           |           | 0.2 |
| < 3 years                               | 23.6 %    | 19.3 %    |     |
| < 5 years                               | 33.2 %    | 23.7 %    |     |

<sup>a</sup> Statistics presented: median (IQR); *n* (%), <sup>b</sup> Statistical tests performed: Kruskal-Wallis test; chi-square test of independence; log-rank test.

**Table S2.** Summary of the ‘NCCNbio-s’ and ‘Clinicalbio-s’ models developed on the train set using hazard ratio, 95% confidence interval (CI) for hazard ratio and *p*-value for each risk factor in the model.

| Features                   | NCCNbio-s    |              |                 | Clinicalbio-s |              |                 |
|----------------------------|--------------|--------------|-----------------|---------------|--------------|-----------------|
|                            | Hazard Ratio | 95% CI       | <i>p</i> -Value | Hazard Ratio  | 95% CI       | <i>p</i> -Value |
| PSA <sup>a</sup>           | -            | -            | -               | 2.616         | [1.87, 3.66] | < 0.001         |
| DRE                        |              |              |                 |               |              |                 |
| (Abnormal vs normal)       | -            | -            | -               | 1.47          | [0.90, 2.40] | 0.124           |
| Biopsy Gleason Score       |              |              |                 |               |              |                 |
| (7 vs 6)                   | -            | -            | -               | 1.597         | [0.95, 2.69] | 0.079           |
| (8 or above vs 6)          | -            | -            | -               | 3.239         | [1.89, 5.56] | < 0.001         |
| NCCN                       |              |              |                 |               |              |                 |
| (Intermediate vs low)      | 1.51         | [0.82, 2.77] | 0.183           | -             | -            | -               |
| (High vs low)              | 4.18         | [2.47, 7.07] | < 0.001         | -             | -            | -               |
| APOAI <sup>‡</sup> (pg/ml) | 1.26         | [0.93, 1.71] | 0.139           | -             | -            | -               |
| ZAG <sup>‡</sup> (pg/ml)   | 0.79         | [0.56, 1.11] | 0.179           | -             | -            | -               |
| PEDF (100 000 pg/ml)       | 0.735        | [0.61, 0.88] | < 0.001         | 0.696         | [0.58, 0.84] | < 0.001         |

<sup>a</sup> The non-linear effect of the predictor using a log transformation.

**Table S3.** The AUC for the ‘NCCNbio-s’ and ‘Clinicalbio-s’ compared to ‘NCCN-s’, ‘Clinical-s’ and ‘Biomarker-s’ for internal validation using the Train set (panel A) and external validation using the Test set (panel B).

| Models        | A) Internal Validation                                          |                                                                 | B) External Validation                                          |                                                                 |
|---------------|-----------------------------------------------------------------|-----------------------------------------------------------------|-----------------------------------------------------------------|-----------------------------------------------------------------|
|               | AUC at 3-year<br>(Train set)                                    | AUC at 5-year<br>(Train set)                                    | AUC at 3-year<br>(Test set)                                     | AUC at 3-year<br>(Test set)                                     |
| NCCN-s        | 0.6241                                                          | 0.6218                                                          | 0.5654                                                          | 0.5121                                                          |
| Clinical-s    | 0.7218                                                          | 0.7778                                                          | 0.5816                                                          | 0.5848                                                          |
| Biomarker-s   | 0.5907                                                          | 0.631                                                           | 0.6186                                                          | 0.6438                                                          |
| NCCNbio-s     | 0.7329;<br><i>p</i> -value (vs NCCN-s) = 0.037 <sup>a</sup>     | 0.7601;<br><i>p</i> -value (vs NCCN-s) = 0.020 <sup>a</sup>     | 0.7102;<br><i>p</i> -value (vs NCCN-s) < 0.001 <sup>a</sup>     | 0.6848;<br><i>p</i> -value (vs NCCN-s) = 0.001 <sup>a</sup>     |
| Clinicalbio-s | 0.7713;<br><i>p</i> -value (vs Clinical-s) = 0.013 <sup>a</sup> | 0.8332;<br><i>p</i> -value (vs Clinical-s) = 0.023 <sup>a</sup> | 0.7360;<br><i>p</i> -value (vs Clinical-s) = 0.015 <sup>a</sup> | 0.7330;<br><i>p</i> -value (vs Clinical-s) = 0.042 <sup>a</sup> |

<sup>a</sup> DeLong test *p*-value.
